# Supplementary material
Source: MDPI journal article supplement (https://www.mdpi.com/2227-9040/11/7/410)
Supplement: s1 [file s1]

Supporting Information

# Preparation and Hydrogen-Sensitive Property of WO<sub>3</sub>/Graphene/Pd Ternary Composite

Lin Wang <sup>1,2</sup>, Fei An <sup>2</sup>, Xinmei Liu <sup>1,\*</sup>, Dongzhi Zhang <sup>3</sup> and Zhe Yang <sup>2,\*</sup>

<sup>1</sup> College of Chemistry and Chemical Engineering, China University of Petroleum (East China), Qingdao 266580, China; wangl.qday@sinopec.com

<sup>2</sup> State Key Laboratory of Safety and Control for Chemicals, SINOPEC Research Institute of Safety Engineering Co. Ltd., Qingdao 266071, China; anf.qday@sinopec.com

<sup>3</sup> College of Control Science and Engineering, China University of Petroleum (East China), Qingdao 266580, China; dzzhang@upc.edu.cn

\* Correspondence: lxmei@upc.edu.cn (X.L.); yangzhe.qday@sinopec.com (Z.Y.); Tel.: +86-532-86980908 (X.L.); +86-532-83786640 (Z.Y.)

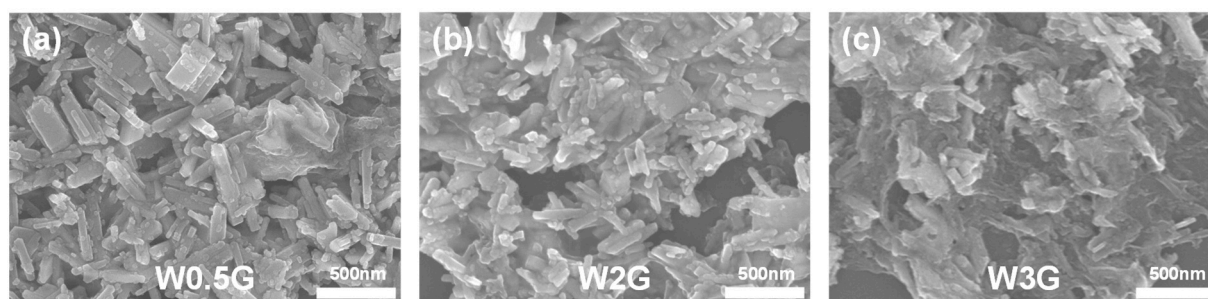

Figure S1. SEM images of (a) W0.5G, (b) W2G and (c) W3G.

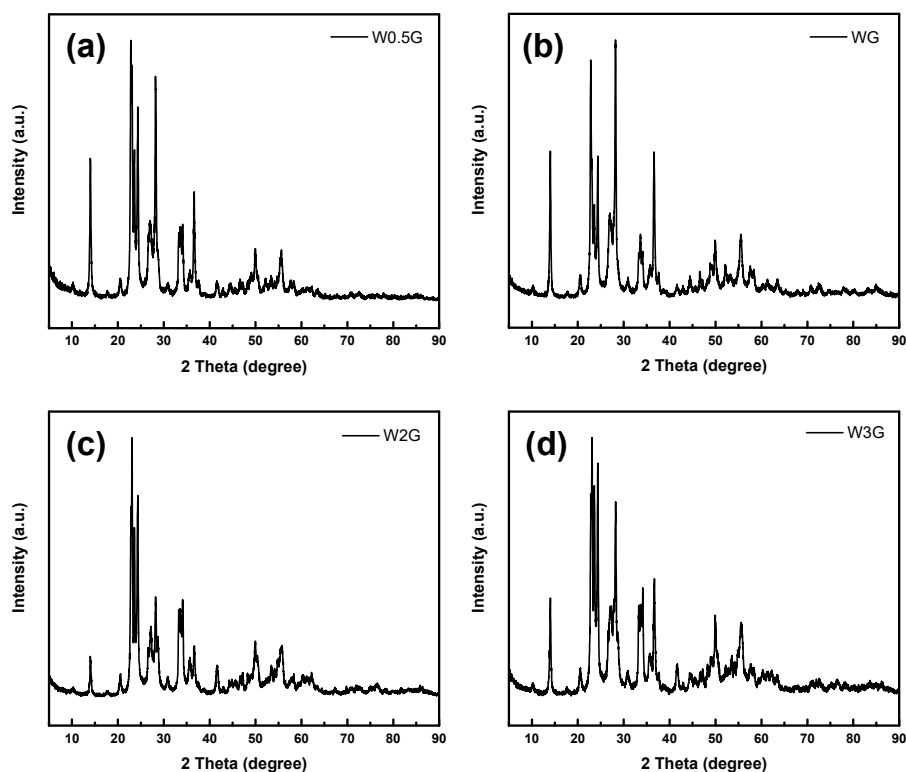

Figure S2. XRD patterns of (a) W0.5G, (b) WG, (c) W2G and (d) W3G.
